Smaller RV in repaired TOF

Original Research Article

**A Smaller Right Ventricle Results in Poorer Exercise Performance**

**in Adolescents After Surgical Repair of Tetralogy of Fallot**

Christiane Mhanna DO<sup>1</sup>, Katerina Kourpas<sup>1</sup>, Takeshi Tsuda MD<sup>1,2†</sup>

<sup>1</sup>Nemours Cardiac Center, Nemours Children's Health

Wilmington, DE 19803, USA

<sup>2</sup>Department of Pediatrics, Sidney Kimmel Medical College at Thomas Jefferson University

Philadelphia, PA 19107, USA

Short Title: Smaller RV in repaired TOF

†Author of Correspondence:

Takeshi Tsuda, MD, FAAP, FACC

Nemours Children's Cardiac Center, Nemours Children's Health

1600 Rockland Rd, Wilmington, DE 19803, USA

Tel: (302)651-6677

FAX: (302)651-6601

Email: [ttsuda@nemours.org](mailto:ttsuda@nemours.org)

Smaller RV in repaired TOF

## Abstract

Background: Chronic pulmonary valve insufficiency frequently results in right ventricular (RV) dilatation and dysfunction in surgically repaired tetralogy of Fallot (rTOF). Correlations between peak exercise performance and progression of RV remodeling in rTOF remain elusive.

Methods: Patients with rTOF were reviewed with cardiopulmonary exercise testing (CPET) and cardiac magnetic resonance (CMR). Peak and submaximal CPET parameters were obtained.

Both RV and left ventricular (LV) volume were measured in end-systole (RVESV and LVESV, respectively) and end-diastole (LVEDV and RVEDV, respectively). Stroke volume (SV), ejection fraction (EF), and pulmonary regurgitant fraction (RF) were calculated.

Results: Thirty-seven patients ( $17 \pm 5$  years; 22 females; 5 with pulmonary atresia and 2 with absent pulmonary valve) were studied. Pulmonary RF was  $28.3 \pm 13.4\%$ . Indexed RVEDV was  $132 \pm 33$  mL/m<sup>2</sup>. Ejection fraction of RV and LV was  $50.3 \pm 7.8\%$  and  $59.1 \pm 6.1\%$ , respectively. Peak oxygen consumption (pVO<sub>2</sub>) was  $71 \pm 16\%$  of predicted maximum value. A strong positive correlation was noted between CMR data including RVEDV, RVSV and LVSV, and pVO<sub>2</sub>. Higher RVEDV was correlated with higher RVSV and LVSV and higher pVO<sub>2</sub>, whereas lower RVEDV was associated with lower RVSV and LVSV and lower pVO<sub>2</sub>.

Conclusion: In rTOF, smaller RV resulted in reduced SV of both ventricles and significantly lower pVO<sub>2</sub>, whereas larger RV provided higher SV and higher pVO<sub>2</sub> regardless of RVEF or RF. Smaller RV in rTOF may represent a unique pathological entity responsible for reduced exercise performance, which requires special consideration when determining further surgical interventions.

Smaller RV in repaired TOF

**Keywords:**

Cardiac magnetic resonance imaging (CMR)

Cardiopulmonary exercise testing (CPET)

Exercise intolerance

Right ventricular remodeling

Pulmonary valve replacement (PVR)

Smaller RV in repaired TOF

## **Clinical Perspective**

*What is New?* We characterized a novel clinical entity after surgical repair of tetralogy of Fallot (TOF) with a relatively small right ventricle (RV) and decreased exercise performance. It is likely due to limited RV stroke volume adjustment in response to peak exercise affecting left ventricular (LV) stroke volume. Although the pathogenesis of this smaller RV remains undetermined, our results shed light on the diverse clinical phenotypes after surgical repair of TOF.

*What are the Clinical Implications?* Pulmonary valve replacement (PVR) is a treatment option for progressive RV dilatation and/or symptoms of exercise intolerance related to persistent pulmonary valve insufficiency in repaired TOF. Our data demonstrated that poor exercise performance was more frequently associated with a smaller RV size rather than dilated RV. Indication for PVR in repaired TOF needs to be carefully assessed in symptomatic patients with non-enlarged RV.

Smaller RV in repaired TOF

## Introduction

Persistent right ventricular (RV) volume overload can cause RV dilatation and dysfunction resulting in RV failure, decreased exercise tolerance and quality of life, and increased premature mortality. This condition is frequently encountered in several congenital heart diseases (CHD) including tetralogy of Fallot (TOF) following transannular patch repair, residual pulmonary valve insufficiency (PI) following balloon valvuloplasty for severe or critical congenital valvar pulmonary stenosis (PS), and after creation of right ventricular outflow tract (RVOT) by a conduit in CHD with certain conotruncal anomalies or after Ross operation [1]. Pulmonary valve replacement (PVR) is a treatment choice for progressive RV dilatation due to persistent PI, but the optimum timing of PVR remains controversial because of its limited longevity [2-4]. Currently, measurement of RV volume estimated by cardiac magnetic resonance (CMR) imaging is regarded as a gold standard to determine the timing of PVR as excessive RV dilatation may not be recoverable [5-7]. Symptoms including exercise intolerance or exercise-induced discomfort are also recognized as important indicators for PVR [8]. However, a correlation between the degree of RV dilatation and exercise-induced symptoms has been inconsistent.

As a noninvasive technique to gauge the level of fitness in patients with CHD, cardiopulmonary exercise testing (CPET) has the capability to assess peak cardiac output, stroke volume (SV), pulmonary function through oxygenation and ventilation, and peripheral muscular status [9]. An indication of CPET in CHD patients includes evaluation of exercise-induced symptoms and arrhythmias in addition to quantification of cardiopulmonary reserve [10]. For patients with repaired TOF (rTOF) who subsequently may need PVR, preoperative CPET has been proposed as routine assessment of predictor of surgical outcome, where peak oxygen

Smaller RV in repaired TOF

consumption (pVO<sub>2</sub>) was found to have the strongest predictor of early mortality with PVR on multivariable analysis [11]. However, the relationship between hemodynamic status and exercise performance has been poorly understood in rTOF.

A primary aim of this study was to investigate whether CPET represents the degree of RV dilatation and dysfunction secondary to chronic volume overload induced by persistent PI in rTOF patients. We aimed to explore how CMR volumetric data correlate with peak exercise performance measured by CPET.

## **Methods**

This retrospective study was approved by the Nemours Children's Health Institutional Review Board in Wilmington, Delaware. The study protocol conformed to the ethical guidelines established by the 1975 Declaration of Helsinki.

### *Patients*

We enrolled patients with rTOF who underwent surgical repair during infancy and who had both CMR and CPET after 10 years of age. Patients with genetic syndromes involving multiple organ systems, those with intellectual disability, or obese individuals (body mass index > 30 kg/m<sup>2</sup>) were excluded. Patients with obesity were excluded as it complicates the interpretation of CPET [12]. Only those who reached peak exercise level were included, either peak respiratory exchange ratio (RER)  $\geq 1.01$  or > 90% of estimated maximum heart rate (HR) for age ( $= 220 - \text{Age}$ ). Demographic information, diagnosis of primary heart disease, and surgical and cardiac catheterization history were obtained from electronic medical health records. The

Smaller RV in repaired TOF

patients' medical information was tightly protected according to Health Insurance Portability and Accountability Act regulation to maintain patient confidentiality and safety with de-identified data.

### *CPET*

All study subjects underwent symptom-limited bike CPET consisting of an electronically braked cycle ergometer following the RAMP (Raise, Activate, Mobilize, and Potentiate) protocol with work rate (WR) of approximately 0.3 Watts/minute increment. Heart rate and oxygen saturation (SaO<sub>2</sub>) were monitored continuously, and blood pressure (BP) was recorded every 2-3 minutes throughout the study and at peak exercise. A 12-lead electrocardiogram (ECG) was recorded continuously throughout the study. Work rate, minute ventilation (VE), oxygen consumption (VO<sub>2</sub>), and carbon dioxide production (VCO<sub>2</sub>) were measured continuously. Peak and submaximal CPET parameters were obtained. Peak parameters included pVO<sub>2</sub>, peak oxygen pulse (pOP), peak work rate (pWR), peak VE, and peak respiratory exchange ratio. Peak VO<sub>2</sub> was also presented as %predicted maximum VO<sub>2</sub> (%PmaxVO<sub>2</sub>). Submaximal parameters were obtained including ventilatory anaerobic threshold (VAT), a slope of VO<sub>2</sub> and HR ( $\Delta$ VO<sub>2</sub>/ $\Delta$ HR; surrogate of SV), and a slope of VE and VCO<sub>2</sub> ( $\Delta$ VE/ $\Delta$ VCO<sub>2</sub>; ventilatory efficiency or ventilatory equivalent of carbon dioxide). Ventilatory anaerobic threshold was also presented as %VAT/PmaxVO<sub>2</sub>. Both absolute and weight-indexed values were presented when appropriate.

### *CMR*

Cardiac magnetic resonance imaging examinations were performed on a 1.5-Tesla MRI scanner (GE Medical System, Chicago, IL United States or Siemens, Germany). Sequences to

Smaller RV in repaired TOF

assess anatomy, volume, function, and phase contrast imaging were reviewed. Obtained parameters include RV and left ventricular (LV) ejection fractions (EF) (RVEF and LVEF) (%), end-diastolic volume (RVEDV and LVEDV) (ml), SV (RVSV and LVSV) (ml), and pulmonary regurgitant fraction (PRF) (%). Ventricular volumes were also expressed as body surface area (BSA)-indexed values (RVEDVi, LVEDVi, RVSVi, and LVSVi) (ml/m<sup>2</sup>) with corresponding z-scores [13] .

### *Statistics*

Descriptive statistics were represented as mean with standard deviation and/or range. Linear regression curves with Spearman correlation were used to evaluate independent correlations. Kruskal Wallis test (nonparametric analysis of variance) with Dunn's multiple comparison. Statistical significance with Student t-test was defined as  $p$ -value < 0.05. The statistical software GraphPad Prism 6 was used for data analysis (San Diego, CA; <https://www.graphpad.com>).

## **Results**

### *Subtypes of TOF and Surgical Procedures*

Patient demographics and clinical characteristics are summarized in **Table 1**. The average age of patients enrolled in CPET was  $18.3 \pm 4.7$  years, and they were predominantly females (62%). The primary diagnosis was TOF with pulmonary stenosis (81%), followed by TOF with pulmonary atresia (14%), and TOF with absent pulmonary valve (5%). Initial reparative surgical



Smaller RV in repaired TOF

intervention was predominantly transannular patch repair (89%); three patients initially received an RV to pulmonary artery (PA) homograft, and one patient underwent creation of a monocusp valve. Six patients required a palliative intervention prior to primary surgical repair of TOF. The average age of initial surgical repair was 1.8 months. After this combined CMR and CPET assessment, two patients underwent RVOT revision, and five patients had PVR.

### *CPET Data*

The CPET data including peak and submaximal values are summarized in **Table 2**. Males and females are presented separately as there are significant differences in CPET values by sex [14]. Weight and height were significantly higher in males, but BMI was comparable. Males showed significantly higher peak systolic BP, pVO<sub>2</sub>/kg, pOP, pWR, pWR/kg, and pVE than females. However, %PmaxVO<sub>2</sub> was comparable between males and females (approximately 70%), which was mildly decreased when compared with the reference values, consistent with the published studies [15-17]. The %VAT/PmaxVO<sub>2</sub> was also comparable between males and females. Males showed higher  $\Delta$ VO<sub>2</sub>/ $\Delta$ HR (both absolute and weight-indexed values) and lower  $\Delta$ VE/ $\Delta$ VCO<sub>2</sub>, suggesting higher SV and better ventilatory efficiency than females. These sex differences are comparable with those in the normal population except for  $\Delta$ VE/ $\Delta$ VCO<sub>2</sub> [14].

### *Volume Measurement by CMR*

Volumetric data by CMR are summarized in **Table 3**. Both RVEDVi and RVSVi were significantly increased in males and females, whereas LVEDVi and LVSVi were not increased.

Smaller RV in repaired TOF

The pulmonary regurgitant fraction was comparable between males and females. Absolute volume values were significantly higher in males than in females, including RVEDV, LVEDV, RVSV, and LVSV, most likely reflecting the difference in body size. The BSA-indexed values, LVEDVi, RVSVi, and LVSVi, were comparable between males and females, whereas RVEDVi was significantly higher in males than in females. There were no statistically significant differences between male and female volumetric z scores. On average, the RVEDV z scores were higher in rTOF patients ( $2.55 \pm 1.77$ ). Z scores of LVEDV, RVSV, and LVSV were comparable with normal reference ranges.

### *Progression of RV Remodeling and Exercise Performance*

To understand the progression of RV dilatation and dysfunction in response to persistent RV volume overload, we arbitrarily divided the cohort into four groups by the degree of RV dilatation (threshold of RVEDVi at  $125 \text{ mL/m}^2$ ) and RV systolic function (threshold of RVEF at 55%) (**Figure 1a**). Group A represents no significant RV dilatation with preserved RV systolic function ( $\text{RVEDVi} < 125 \text{ mL/m}^2$  and  $\text{RVEF} > 55\%$ ). Group B represents those with significant RV dilatation with preserved RV systolic function ( $\text{RVEDVi} \geq 125 \text{ mL/m}^2$  and  $\text{RVEF} > 55\%$ ). Group B is regarded as a slightly advanced stage of RV volume overload from Group A. Group C represents further progression from B with RV dilatation and RV systolic dysfunction ( $\text{RVEDVi} \geq 125 \text{ mL/m}^2$  and  $\text{RVEF} < 55\%$ ). Group D refers to a group with decreased RV systolic function without RV dilatation, defined as  $\text{RVEDVi} < 125 \text{ mL/m}^2$  and  $\text{RVEF} < 55\%$ .

**Figures 1b to 1g** show certain CPET and CMR parameters in four groups. There was no significant difference between the four groups in %PmaxVO<sub>2</sub>, %VAT/PmaxVO<sub>2</sub>, LVEDVi, or

Smaller RV in repaired TOF

LVSVi. More importantly, there was no decline in %PmaxVO<sub>2</sub> or %VAT/PmaxVO<sub>2</sub> in response to the degree of progress in RV remodeling (from groups A, B, to C). Group D exhibited significantly lower PRF than group B ( $p < 0.05$ ). Larger RVEDVi groups (groups B and C) demonstrated significantly higher RVSVi than smaller RVEDV groups (groups A and D). Our data indicate that larger RVEDVi was associated with higher RVSVi regardless of RV systolic function. Both LVEDVi and LVSVi showed a similar trend as RVSVi in four groups but did not show statistical significance. In contrast, smaller RV groups (A and D) revealed significantly lower RVSVi than larger RV groups (B and C) regardless of systolic function.

### *RV Dilatation is Associated with Higher SV and Better Exercise Performance*

Correlations between CMR measurements and CPET values are shown in **Figure 2**. Non-indexed absolute values were compared. There was a statistically significant correlation between RVEDV and pVO<sub>2</sub> ( $p = 0.0003$ ), RVEDV and RSV ( $p < 0.0001$ ), RSV and LSV ( $p < 0.0001$ ), RSV and pVO<sub>2</sub> ( $p < 0.0001$ ), RVEDV and LVEDV ( $p < 0.0001$ ), and LSV and pVO<sub>2</sub> ( $p = 0.0005$ ). Our data indicate that larger RVEDV was associated with higher RSV, LSV, and pVO<sub>2</sub>, suggesting the larger RV size are associated with higher peak exercise performance; the degree of RV dilatation had nothing to do with low SV or low pVO<sub>2</sub>.

Because there were significant sex differences in CPET and CMR parameters (**Tables 2 and 3**), the correlation curves obtained in **Figure 2** were expressed males and females separately (**Figure 3**), which showed the same trends seen in **Figure 2** except no strong correlation between RVEDV and pVO<sub>2</sub> in males (**Figure 3a**). It was a smaller RV that revealed significantly lower SV and lower pVO<sub>2</sub> in both males and females.

Smaller RV in repaired TOF

### *Clinical Outcomes after PVR*

Of the 37-patient cohort, a total of nine patients underwent PVR. Comparative data (symptoms, pVO<sub>2</sub>, and RVEDVi) of patients before and after PVR are summarized in **Table 4**. Only two patients were noted to have symptoms prior to PVR, and both continued to have symptoms afterward. Many patients developed symptoms following PVR. Of five patients who had CPET before and after PVR, none showed improvement in pVO<sub>2</sub>/kg. After PVR, RVEDVi decreased in three patients but increased in two patients. Two patients needed repeat PVR.

### **Discussion**

Our current data showed that patients with rTOF demonstrated mildly diminished peak exercise performance (approximately 70% of predicted max VO<sub>2</sub>) in both males and females. Surprisingly, the severity of RV dilatation indicated by RVEDV (ml) had no correlation with decreased exercise performance. On the contrary, there was a significant positive correlation between RVEDV and peak exercise performance presented by peak VO<sub>2</sub> (L/min) in both males and females. An enlarged RV provided higher RVSV and LVSV and thus higher pVO<sub>2</sub> than smaller RV. Patients with smaller RV revealed poorer exercise performance regardless of systolic function. Our findings suggest complex changes in RV myocardium after surgical repair of TOF, responsible for diverse clinical phenotype in rTOF.

### *Development of RV Remodeling and Exercise Performance*

## Smaller RV in repaired TOF

Our data demonstrated that pVO<sub>2</sub> did not decrease by the degree of RV dilatation. In fact, larger RV provided higher SV (both RV and LV) and better pVO<sub>2</sub> than smaller RV (**Figures 2 and 3**). Roest et al. performed a prospective CMR study of 15 patients with rTOF at rest and submaximal exercise (~ 60% peak level) and demonstrated that the degree of PI decreased significantly during supine bike exercise ( $p = 0.012$ ), suggesting PI and RV dilatation may not be a strong determinant of exercise intolerance [18]. Our study revealed that the smaller RV was correlated with lower RVSV, lower LVSV, and lower pVO<sub>2</sub> regardless of RV systolic function (groups A and D in comparison with groups B and C in **Figure 2**); both RVSV and LVSV at rest by CMR correlated well with pVO<sub>2</sub>, as also shown in a recent study [16]. O’Meagher et al. compared rTOF patients between higher RVEDVi ( $\geq 150$  ml/m<sup>2</sup>) and lower RVEDVi ( $< 150$  ml/m<sup>2</sup>) and showed that there were no differences in LVEF, LVSVi, or exercise capacity including VAT/kg and pVO<sub>2</sub>/kg [19]. In another study of rTOF patients who underwent CPET and CMR, RVEF was the only CMR predictor of %Pmax VO<sub>2</sub>, pOP, and VAT [20]. It was proposed from a recent study that RVEF  $< 40\%$  may be useful to identify prognostically significant reduction in exercise capacity with varying degrees of RV dilatation [21]. In our study, there was only one patient with RVEF  $< 40\%$  (see **Figure 1A**). Our data as well as other published studies indicate that peak exercise performance and exercise-induced symptoms do not represent the degree of RV dilatation or dysfunction [22].

### *Small RV Despite PI, a New Pathological Entity in rTOF?*

Our study demonstrated that patients with lower RVEDVi (smaller RV) had significantly lower RVSVi regardless of systolic function (**Figure 1e**). There was strong positive correlation between RVSV and pVO<sub>2</sub> (both absolute values; **Figure 2e**). It is plausible that small RV represents

Smaller RV in repaired TOF

hemodynamically restrictive ventricle causing diastolic dysfunction, which impairs diastolic relaxation and filling and limits cardiac output increase during exercise [23]. In our cohort, there were no differences in surgical profile or number of surgeries between smaller and larger RV groups (**Suppl. Table 1**). The amount of PI and consequent RV dilatation and dysfunction are regarded as major prognostic determinants following TOF repair. It has been proposed that the presence of a restrictive RV limits the detrimental effects of PI that enhances better antegrade flow across RVOT and improve exercise performance [24], which is completely opposite from our findings of smaller RV having worse exercise performance. Regarding CPET analysis in rTOF, small RV has never been addressed as a cause of poor exercise performance in the recent review article [25]. The pathogenesis of small RV in rTOF, however, remains undetermined in this study.

Kim et al. studied 48 rTOF patients and demonstrated that those with higher pulmonary artery elastance (or advanced pulmonary vascular dysfunction) were associated with higher mean PA pressure, smaller RVEDVi, and significantly lower pVO<sub>2</sub>, describing a similar clinical entity of small RV size with poor exercise performance [26]. They suggested decreased pulmonary vascular distensibility as a cause of impaired exercise performance in rTOF, probably due to suppression of increased antegrade flow across an incompetent pulmonary valve during exercise. The authors did not assess the direct relationship between RV size and pVO<sub>2</sub>. The interaction between RV and PA (RV-PA coupling) may be another important determinant of effective SV and exercise performance in rTOF [27]. In older patients ( $33 \pm 13$  years), Egbe et al. demonstrated a similar finding of negative correlation with PA elastance and exercise capacity [28]. However, the relationship between smaller RV and increased PA elastance was not discussed in these studies.

Smaller RV in repaired TOF

### *Indication and Optimum Timing for PVR*

The optimum timing of PVR in rTOF patients has been extensively discussed [29-32]. The controversy of indications and optimum timing of PVR is primarily because of the limited longevity of the prosthetic valve. Valve function in pediatric patients with CHD, mainly TOF, who undergo valve replacement in the pulmonary position can be expected to remain stable for 5 years after placement [33], but this may be shorter in younger patients. By 10 years, most patients (approximately 80%) will develop valvular dysfunction and often require reoperation. In another study of pediatric rTOF patients who underwent PVR, freedom from reoperation was approximately 66% and 21% at 10 and 15 years, respectively [34]. The challenge becomes when determining the need for PVR to prevent irreversible RV remodeling against the timed life expectancy of prosthetic valves that lead to subsequent reoperations. The timing of PVR is usually determined by the degree of RV dilatation and/or the presence of exercise-related symptoms [35]. The RV volume measurement by CMR has become a gold standard to determine the indication for PVR for rTOF; patients with  $RVEDVi > 150-180 \text{ ml/m}^2$  are indicated for PVR as RV dilatation may not recover once  $RVEDVi$  exceeds more than  $170 \text{ ml/m}^2$  [4,35,36].

Symptomatic patients with exercise intolerance not explained by extracardiac causes or chronotropic incompetence are often considered for PVR [35]. The CPET is routinely performed to assess the degree of exercise intolerance for the indication for PVR. However, the CPET parameters usually do not represent the severity of RV dilatation or dysfunction in rTOF as we presented in this study. In a recent meta-analysis of over 700 patients with rTOF, CPET values did not significantly change following PVR [37]. A few other studies also demonstrated that exercise performance did not improve after PVR for severe RV dilatation due to chronic PI

Smaller RV in repaired TOF

despite significant reduction of RV dilatation [38-40], suggesting that peak exercise performance represented by pVO<sub>2</sub> may be an independent parameter from the degree of RV dilatation.

### *What Does PVR Do for rTOF with RV Dilatation?*

Surgical indications for PVR for rTOF include progressive RV remodeling (RV dilatation and/or RV dysfunction), poor exercise performance, and symptoms with or without exercise. In a meta-analysis of 48 studies including over 3000 patients with rTOF who subsequently underwent PVR, there was noted improvement in biventricular function, RV volume, and symptoms [3]. Of these, 22 studies reported data on RVEDVi before and after PVR, and a statistically significant overall reduction in RVEDVi was noted. Twenty-six studies reported the New York Heart Association functional classification (NYHA) and demonstrated an overall significant reduction in NYHA classification following PVR. By the meta-regression method, patients with larger RV preoperatively had the best response in terms of RV geometry and decrease in RV volume postoperatively but had the lowest improvement in symptoms.

Although improvement of RV dilatation after PVR for advanced RV dilatation is quite consistent [41], the improvement of symptoms or exercise capacity by PVR remains controversial. Gengsakul et al. studied the outcome of PVR in adult rTOF patients and found that PVR resulted in subjective improvement in functional NYHA status and reduction in RVEDVi without significant improvement in exercise capacity [42]. Lack of improvement in objective CPET data was attributed to the presence of persistent RV dysfunction following PVR. Ho et al. studied CPET of rTOF (average age 20.0 years) before and after PVR and demonstrated no notable improvement in pVO<sub>2</sub> despite significant reduction of RVEDVi by CMR [17]. It appears



Smaller RV in repaired TOF

that the degree of RV remodeling, exercise performance, and symptoms do not always correlate well with one another.

### *Limitations*

We acknowledge several limitations in our retrospective, single-center study. First, there is an intrinsic selection bias since there were no standardized guidelines for timing of CPET and CMR in our cohort. Most of our patients underwent these diagnostic tests in consideration for PVR because of echocardiographic findings suggestive of RV remodeling and/or presence of exercise-related symptoms. Second, RV diastolic dysfunction was not assessed in this study as echocardiographic assessment of diastolic function was not consistently obtained. The assessment of RV diastolic function could provide an additional insight into the pathophysiology of smaller RV patients exhibiting worse exercise performance. Third, RV remodeling consisting of dilatation and dysfunction is a complex pathological process in rTOF. Our cohort consists of relatively young rTOF subjects, which may be quite different from adults with chronic RV dilatation. Advanced RV remodeling seen adult rTOF patients with myocardial fibrosis in addition to severe RV dilatation and dysfunction may present with additional pathological features. Additionally, CPET is affected by physical conditioning and body habitus, which could affect pVO<sub>2</sub>. These factors were not controlled in our study. Lastly, this is a retrospective, single-center study with a relatively small cohort size that limits statistical power.

### **Conclusion**

Smaller RV in repaired TOF

One of the chronic sequelae of surgically rTOF is progressive RV dilatation and dysfunction due to persistent PI, which is a common indication for PVR. Presence of exercise-induced symptoms and/or exercise intolerance is regarded as another relevant indication for surgical intervention. In our small cohort of rTOF patients, there was no correlation between the degree of RV dilatation and worsening of pVO<sub>2</sub>; on the contrary, the patients with more dilated RV tended to show better pVO<sub>2</sub> than those with smaller RV regardless of systolic function. A group of rTOF patients presented with smaller RV volume with poor exercise performance, which may be a unique pathological entity that requires special consideration for further surgical management. Although our study highlights the diverse clinical phenotype of rTOF, the underlying pathogenesis of rTOF with small RV remains undetermined. Further clinical investigation is warranted to delineate pathophysiology of post-TOF patients, particularly in view of RV diastolic dysfunction and impaired RV-PA coupling.

## **Acknowledgements**

Authors would like to acknowledge Gina D'Aloisio, MS for querying the exercise database and Kimberley Eissmann for editing the manuscript text.

## **Disclosures**

The authors have nothing to disclose.

## **Data Availability Statement**

Data will be available upon contact with the corresponding author.

Smaller RV in repaired TOF

## Figure Legends

**Figure 1** *a*: Sequence of right ventricular (RV) remodeling in response to chronic pulmonary insufficiency. Patients were divided into four groups by indexed right ventricular end-diastole volume (RVEDVi) of 125 ml/m<sup>2</sup> and right ventricular ejection fraction (RVEF) of 55%. The levels of RV remodeling were graded as A (less-dilated RV with normal systolic function: mild), B (dilated RV with normal systolic function: moderate), and C (dilated RV with decreased systolic function: advanced). D is a special group with less dilated RV with decreased systolic function. Sex distribution is shown as (male : female). Certain CPET and CMR parameters were compared within the four groups. *b*: %PmaxVO<sub>2</sub> (%), *c*: %VAT/PmaxVO<sub>2</sub> (%), *d*: PRF (%), *e*: RSVi (ml/m<sup>2</sup>), *f*: LVEDVi (ml/m<sup>2</sup>), and *g*: LSVi (ml/m<sup>2</sup>). LVEDVi, indexed left ventricular end-diastole volume; LSVi, indexed left ventricular stroke volume; pVO<sub>2</sub>, peak oxygen consumption; %PmaxVO<sub>2</sub>, % predicted max VO<sub>2</sub>; PRF, pulmonary regurgitant fraction; RSVi, right ventricular stroke volume; VAT, ventilatory anaerobic threshold.

**Figure 2** Correlations between parameters of cardiopulmonary exercise testing and cardiac magnetic resonance. *a*: RVEDV (ml) and pVO<sub>2</sub> (L/min), *b*: RVEDV (ml) and RSV (ml), *c*: RSV (ml) and LSV (ml), *d*: RVEDV (ml) and LVEDV (ml), *e*: RSV (ml) and pVO<sub>2</sub> (L/min), and *f*: LSV (ml) and pVO<sub>2</sub> (L/min). All showed an excellent positive correlation ( $p \leq 0.0005$ ). LVEDV, left ventricular end-diastole volume; LSV, left ventricular stroke volume; pVO<sub>2</sub>, peak oxygen consumption; RVEDV, right ventricular end-diastole volume; RSV, right ventricular stroke volume.

Smaller RV in repaired TOF

**Figure 3** The correlation curves in Figure 2 are presented in male and female separately. *a*: RVEDV (ml) and pVO<sub>2</sub> (L/min), *b*: RVEDV (ml) and RSV (ml), *c*: RSV (ml) and LVSC (ml), *d*: RVEDV (ml) and LVEDV (ml), *e*: RSV (ml) and pVO<sub>2</sub> (L/min), and *f*: LSV (ml) and pVO<sub>2</sub> (L/min). All showed significant positive correlation ( $p < 0.05$ ) except RVEDV and pVO<sub>2</sub> correlation in male (*a*). LVEDV, left ventricular end-diastole volume; LSV, left ventricular stroke volume; pVO<sub>2</sub>, peak oxygen consumption; RVEDV, right ventricular end-diastole volume; RSV, right ventricular stroke volume.

Smaller RV in repaired TOF

## References

- 1 Bhagra CJ, Hickey EJ, Van De Bruaene A, Roche SL, Horlick EM, Wald RM (2017) Pulmonary Valve Procedures Late After Repair of Tetralogy of Fallot: Current Perspectives and Contemporary Approaches to Management. *Can J Cardiol* 33: 1138-1149
- 2 Baumgartner H, Bonhoeffer P, De Groot NM, de Haan F, Deanfield JE, Galie N, Gatzoulis MA, Gohlke-Baerwolf C, Kaemmerer H, Kilner P, Meijboom F, Mulder BJ, Oechslin E, Oliver JM, Serraf A, Szatmari A, Thaulow E, Vouhe PR, Walma E, Task Force on the Management of Grown-up Congenital Heart Disease of the European Society of C, Association for European Paediatric C, Guidelines ESCCfP (2010) ESC Guidelines for the management of grown-up congenital heart disease (new version 2010). *Eur Heart J* 31: 2915-2957
- 3 Ferraz Cavalcanti PE, Sa MP, Santos CA, Esmeraldo IM, de Escobar RR, de Menezes AM, de Azevedo OM, Jr., de Vasconcelos Silva FP, Lins RF, Lima Rde C (2013) Pulmonary valve replacement after operative repair of tetralogy of Fallot: meta-analysis and meta-regression of 3,118 patients from 48 studies. *J Am Coll Cardiol* 62: 2227-2243
- 4 Geva T (2006) Indications and timing of pulmonary valve replacement after tetralogy of Fallot repair. *Semin Thorac Cardiovasc Surg Pediatr Card Surg Annu*: 11-22
- 5 Buechel ER, Dave HH, Kellenberger CJ, Dodge-Khatami A, Pretre R, Berger F, Bauersfeld U (2005) Remodelling of the right ventricle after early pulmonary valve replacement in children with repaired tetralogy of Fallot: assessment by cardiovascular magnetic resonance. *Eur Heart J* 26: 2721-2727
- 6 Oosterhof T, van Straten A, Vliegen HW, Meijboom FJ, van Dijk AP, Spijkerboer AM, Bouma BJ, Zwinderman AH, Hazekamp MG, de Roos A, Mulder BJ (2007) Preoperative thresholds for pulmonary valve replacement in patients with corrected tetralogy of Fallot using cardiovascular magnetic resonance. *Circulation* 116: 545-551

## Smaller RV in repaired TOF

- 7 Geva T (2011) Repaired tetralogy of Fallot: the roles of cardiovascular magnetic resonance in evaluating pathophysiology and for pulmonary valve replacement decision support. *J Cardiovasc Magn Reson* 13: 9
- 8 Tatewaki H, Shiose A (2018) Pulmonary valve replacement after repaired Tetralogy of Fallot. *Gen Thorac Cardiovasc Surg* 66: 509-515
- 9 Albouaini K, Egred M, Alahmar A, Wright DJ (2007) Cardiopulmonary exercise testing and its application. *Heart* 93: 1285-1292
- 10 Takken T, Blank AC, Hulzebos EH, van Brussel M, Groen WG, Helders PJ (2009) Cardiopulmonary exercise testing in congenital heart disease: (contra)indications and interpretation. *Neth Heart J* 17: 385-392
- 11 Babu-Narayan SV, Diller GP, Gheta RR, Bastin AJ, Karonis T, Li W, Pennell DJ, Uemura H, Sethia B, Gatzoulis MA, Shore DF (2014) Clinical outcomes of surgical pulmonary valve replacement after repair of tetralogy of Fallot and potential prognostic value of preoperative cardiopulmonary exercise testing. *Circulation* 129: 18-27
- 12 Gonze BB, Ostolin T, Barbosa ACB, Matheus AC, Sperandio EF, Gagliardi ART, Arantes RL, Romiti M, Dourado VZ (2021) Dynamic physiological responses in obese and non-obese adults submitted to cardiopulmonary exercise test. *PLoS One* 16: e0255724
- 13 Buechel EV, Kaiser T, Jackson C, Schmitz A, Kellenberger CJ (2009) Normal right- and left ventricular volumes and myocardial mass in children measured by steady state free precession cardiovascular magnetic resonance. *J Cardiovasc Magn Reson* 11: 19
- 14 Kernizan D, Glass A, D'Aloisio G, Hossain J, Tsuda T (2022) A Combined Analysis of Peak and Submaximal Exercise Parameters in Delineating Underlying Mechanisms of Sex Differences in Healthy Adolescents. *Pediatr Cardiol* 43: 1122-1130
- 15 Kipps AK, Powell AJ, Levine JC (2011) Muscular infundibular atresia is associated with coronary ostial atresia in pulmonary atresia with intact ventricular septum. *Congenit Heart Dis* 6: 444-450

## Smaller RV in repaired TOF

- 16 Leonardi B, Gentili F, Perrone MA, Sollazzo F, Cocomello L, Silva Kikina S, Wald RM, Palmieri V, Secinaro A, Gagliardi MG, Parisi A, Turchetta A, Galletti L, Bianco M, Drago F (2022) Cardiopulmonary Exercise Testing in Repaired Tetralogy of Fallot: Multiparametric Overview and Correlation with Cardiac Magnetic Resonance and Physical Activity Level. *J Cardiovasc Dev Dis* 9:
- 17 Ho JG, Schamberger MS, Hurwitz RA, Johnson TR, Sterrett LE, Ebenroth ES (2015) The Effects of Pulmonary Valve Replacement for Severe Pulmonary Regurgitation on Exercise Capacity and Cardiac Function. *Pediatr Cardiol* 36: 1194-1203
- 18 Roest AA, Helbing WA, Kunz P, van den Aardweg JG, Lamb HJ, Vliegen HW, van der Wall EE, de Roos A (2002) Exercise MR imaging in the assessment of pulmonary regurgitation and biventricular function in patients after tetralogy of fallot repair. *Radiology* 223: 204-211
- 19 O'Meagher S, Munoz PA, Alison JA, Young IH, Tanous DJ, Celermajer DS, Puranik R (2012) Exercise capacity and stroke volume are preserved late after tetralogy repair, despite severe right ventricular dilatation. *Heart* 98: 1595-1599
- 20 Meadows J, Powell AJ, Geva T, Dorfman A, Gauvreau K, Rhodes J (2007) Cardiac magnetic resonance imaging correlates of exercise capacity in patients with surgically repaired tetralogy of Fallot. *Am J Cardiol* 100: 1446-1450
- 21 Rashid I, Mahmood A, Ismail TF, O'Meagher S, Kutty S, Celermajer D, Puranik R (2020) Right ventricular systolic dysfunction but not dilatation correlates with prognostically significant reductions in exercise capacity in repaired Tetralogy of Fallot. *Eur Heart J Cardiovasc Imaging* 21: 906-913
- 22 Menon SC, Kaza AK, Puchalski MD (2012) Effect of ventricular size and function on exercise performance and the electrocardiogram in repaired tetralogy of Fallot with pure pulmonary regurgitation. *Ann Pediatr Cardiol* 5: 151-155
- 23 Barmeyer A, Mullerleile K, Mortensen K, Meinertz T (2009) Diastolic dysfunction in exercise and its role for exercise capacity. *Heart Fail Rev* 14: 125-134

## Smaller RV in repaired TOF

- 24 Redington AN (2006) Determinants and assessment of pulmonary regurgitation in tetralogy of Fallot: practice and pitfalls. *Cardiol Clin* 24: 631-639, vii
- 25 Alborikan S, Pandya B, Von Klemperer K, Walker F, Cullen S, Badiani S, Bhattacharyya S, Lloyd G (2020) Cardiopulmonary exercise test (CPET) in patients with repaired Tetralogy of Fallot (rTOF); A systemic review. *International journal of cardiology congenital heart disease* 1: 100050
- 26 Kim SJ, Li MH, Noh CI, Kim SH, Lee CH, Yoon JK (2023) Impact of Pulmonary Arterial Elastance on Right Ventricular Mechanics and Exercise Capacity in Repaired Tetralogy of Fallot. *Korean Circ J* 53: 406-417
- 27 Egbe AC, Kothapalli S, Miranda WR, Pislaru S, Ammash NM, Borlaug BA, Pellikka PA, Najam M, Connolly HM (2019) Assessment of Right Ventricular-Pulmonary Arterial Coupling in Chronic Pulmonary Regurgitation. *Can J Cardiol* 35: 914-922
- 28 Egbe AC, Anavekar NS, Connolly HM (2019) Abnormal Pulmonary Arterial Elastance Is Associated With Reduced Exercise Capacity in Tetralogy of Fallot. *J Am Heart Assoc* 8: e011731
- 29 van Huysduynen BH, van Straten A, Swenne CA, Maan AC, van Eck HJ, Schaliij MJ, van der Wall EE, de Roos A, Hazekamp MG, Vliegen HW (2005) Reduction of QRS duration after pulmonary valve replacement in adult Fallot patients is related to reduction of right ventricular volume. *Eur Heart J* 26: 928-932
- 30 Discigil B, Dearani JA, Puga FJ, Schaff HV, Hagler DJ, Warnes CA, Danielson GK (2001) Late pulmonary valve replacement after repair of tetralogy of Fallot. *J Thorac Cardiovasc Surg* 121: 344-351
- 31 Therrien J, Siu SC, McLaughlin PR, Liu PP, Williams WG, Webb GD (2000) Pulmonary valve replacement in adults late after repair of tetralogy of fallot: are we operating too late? *J Am Coll Cardiol* 36: 1670-1675



## Smaller RV in repaired TOF

- 32 Lim C, Lee JY, Kim WH, Kim SC, Song JY, Kim SJ, Choh JH, Kim CW (2004) Early replacement of pulmonary valve after repair of tetralogy: is it really beneficial? *Eur J Cardiothorac Surg* 25: 728-734
- 33 Lee C, Park CS, Lee CH, Kwak JG, Kim SJ, Shim WS, Song JY, Choi EY, Lee SY (2011) Durability of bioprosthetic valves in the pulmonary position: long-term follow-up of 181 implants in patients with congenital heart disease. *J Thorac Cardiovasc Surg* 142: 351-358
- 34 Jang W, Kim YJ, Choi K, Lim HG, Kim WH, Lee JR (2012) Mid-term results of bioprosthetic pulmonary valve replacement in pulmonary regurgitation after tetralogy of Fallot repair. *Eur J Cardiothorac Surg* 42: e1-8
- 35 Geva T (2013) Indications for pulmonary valve replacement in repaired tetralogy of fallot: the quest continues. *Circulation* 128: 1855-1857
- 36 Therrien J, Provost Y, Merchant N, Williams W, Colman J, Webb G (2005) Optimal timing for pulmonary valve replacement in adults after tetralogy of Fallot repair. *Am J Cardiol* 95: 779-782
- 37 Van den Eynde J, Sa M, Vervoort D, Roever L, Meyns B, Budts W, Gewillig M, Ruhparwar A, Zhigalov K, Weymann A (2022) Pulmonary Valve Replacement in Tetralogy of Fallot: An Updated Meta-Analysis. *Ann Thorac Surg* 113: 1036-1046
- 38 Frigiola A, Tsang V, Bull C, Coats L, Khambadkone S, Derrick G, Mist B, Walker F, van Doorn C, Bonhoeffer P, Taylor AM (2008) Biventricular response after pulmonary valve replacement for right ventricular outflow tract dysfunction: is age a predictor of outcome? *Circulation* 118: S182-190
- 39 Ghez O, Tsang VT, Frigiola A, Coats L, Taylor A, Van Doorn C, Bonhoeffer P, De Leval M (2007) Right ventricular outflow tract reconstruction for pulmonary regurgitation after repair of tetralogy of Fallot. Preliminary results. *Eur J Cardiothorac Surg* 31: 654-658
- 40 Gauthier N, Muter A, Rhodes J, Gauvreau K, Nathan M (2021) Better preoperative exercise function is associated with shorter hospital stay after paediatric pulmonary valve replacement or conduit revision. *Cardiol Young* 31: 1636-1643

## Smaller RV in repaired TOF

- 41 Heng EL, Gatzoulis MA, Uebing A, Sethia B, Uemura H, Smith GC, Diller GP, McCarthy KP, Ho SY, Li W, Wright P, Spadotto V, Kilner PJ, Oldershaw P, Pennell DJ, Shore DF, Babu-Narayan SV (2017) Immediate and Midterm Cardiac Remodeling After Surgical Pulmonary Valve Replacement in Adults With Repaired Tetralogy of Fallot: A Prospective Cardiovascular Magnetic Resonance and Clinical Study. *Circulation* 136: 1703-1713
- 42 Gengsakul A, Harris L, Bradley TJ, Webb GD, Williams WG, Siu SC, Merchant N, McCrindle BW (2007) The impact of pulmonary valve replacement after tetralogy of Fallot repair: a matched comparison. *Eur J Cardiothorac Surg* 32: 462-468

**Table 1 Patients' Background Information**

|                                                 | All patients (N = 37) | Male (N = 14)     | Female (N = 23)  |
|-------------------------------------------------|-----------------------|-------------------|------------------|
| <b>Primary diagnosis</b>                        |                       |                   |                  |
| TOF/pulmonary stenosis (%)                      | 30 (81)               | 13 (93)           | 17 (74)          |
| TOF/pulmonary atresia (%)                       | 5 (14)                | -                 | 5 (22)           |
| TOF/absent pulmonary valve (%)                  | 2 (5)                 | 1 (7)             | 1 (4)            |
| <b>Initial reparative surgical repair</b>       |                       |                   |                  |
| Transannular patch repair (%)                   | 33 (89)               | 12 (86)           | 21 (91)          |
| RV-PA homograft (%)                             | 3 (8)                 | 2 (14)            | 1 (4)            |
| Creation of Monocusp valve (%)                  | 1 (3)                 | -                 | 1 (4)            |
| <b>Intervention prior to primary repair (%)</b> |                       |                   |                  |
| Palliated with BT shunt                         | 5 (14)                | 4 (29)            | 1 (4)            |
| Pulmonary balloon valvuloplasty                 | 1 (3)                 | -                 | 1 (4)            |
| <b>Age at initial surgery (months) [range]</b>  |                       |                   |                  |
| Age at second surgery (months)                  | 1.8 ± 4.1 [0-17]      | 2.0 ± 3.5 [0-13]  | 1.7 ± 4.5 [0-17] |
| Median number of lifetime surgery               | 90 ± 110 [3-325]      | 136 ± 117 [5-325] | 94 ± 11 [3-267]  |
| Median number of lifetime surgery               | 2 [1-4]               | 2 [1-3]           | 2 [1-4]          |
| Median number of total interventions*           | 3 [1-8]               | 3 [1-7]           | 3 [1-8]          |
| <b>Subsequent intervention</b>                  |                       |                   |                  |
| RVOT revision (%)                               | 2 (5)                 | -                 | 2 (9)            |
| Pulmonary valve replacement (%)                 | 5 (14)                | 3 (21)            | 2 (9)            |
| Both (%)                                        | 1 (3)                 | -                 | 1 (4)            |

\*Cardiac catheterization + surgery

Data are presented as mean ± standard deviation [range]. BT shunt, Blalock-Taussig shunt; PA, pulmonary artery; RV, right ventricular; RVOT, right ventricular outflow tract; TOF, tetralogy of Fallot.

Table 2

## CPET Parameters

|                                                     | All patients (N = 37)    | Male (N = 14)            | Female (N = 23)          | <i>p Value</i>     |
|-----------------------------------------------------|--------------------------|--------------------------|--------------------------|--------------------|
| <b>Patient demographics</b>                         |                          |                          |                          |                    |
| Age at CPET (years)                                 | 18.3 ± 4.7               | 20.0 ± 6.0 [13-30]       | 17.3 ± 3.5 [12-25]       |                    |
| Weight (kg)                                         | 66.3 ± 12.7 [39.7-99.5]  | 74.4 ± 12.8 [53.7-99.5]  | 61.4 ± 9.9 [39.7-78]     | <b>0.0015</b>      |
| Height (cm)                                         | 167 ± 11 [144-187]       | 175 ± 4 [169-185]        | 162 ± 10 [144-187]       | <b>&lt; 0.0001</b> |
| BMI (kg/m <sup>2</sup> )                            | 23.9 ± 3.8 [16-32]       | 24.2 ± 4.2 [17-32]       | 23.6 ± 3.6 [16-30]       | 0.679              |
| <b>Peak CPET values</b>                             |                          |                          |                          |                    |
| Peak HR (bpm)                                       | 175 ± 19 [130-205]       | 178 ± 23 [134-205]       | 173 ± 17 [130-196]       | 0.392              |
| Peak SBP (mmHg)                                     | 150 ± 23 [108-200]       | 162 ± 22 [108-196]       | 142 ± 20 [118-200]       | <b>0.007</b>       |
| pVO <sub>2</sub> (mL/kg/min)                        | 27.5 ± 6.8 [17.6-42.4]   | 30.7 ± 7.7 [19.1-42.4]   | 25.5 ± 5.5 [17.6-38]     | <b>0.023</b>       |
| pVO <sub>2</sub> /predicted max VO <sub>2</sub> (%) | 71 ± 16 [42-109]         | 68.1 ± 17.1 [42.4-94.2]  | 73 ± 15.6 [50-109]       | 0.389              |
| pOP (mL/beat)                                       | 10.5 ± 2.8 [5.4-17.1]    | 12.9 ± 2.4 [8.9-17.1]    | 9.0 ± 1.8 [5.4-14.1]     | <b>&lt; 0.0001</b> |
| pWR (Watts)                                         | 131 ± 40 [51-208]        | 163 ± 34 [113-208]       | 111 ± 29 [51-180]        | <b>&lt; 0.0001</b> |
| pWR (Watts/kg)                                      | 1.97 ± 0.51 [1.23-3.12]  | 2.25 ± 0.57 [1.41-3.12]  | 1.81 ± 0.40 [1.23-2.65]  | <b>0.009</b>       |
| pVE (L/min)                                         | 77.7 ± 24.5 [33.2-154.7] | 93.8 ± 27.8 [63.7-154.7] | 67.9 ± 16.6 [33.2-106.4] | <b>0.001</b>       |
| pRER                                                | 1.20 ± 0.11 [1.01-1.62]  | 1.26 ± 0.12 [1.13-1.62]  | 1.20 ± 0.10 [1.01-1.42]  | 0.144              |
| <b>Submaximal CPET values</b>                       |                          |                          |                          |                    |
| VAT (mL/kg/min)                                     | 20 ± 7.5 [9.5-48]        | 22.5 ± 10.4 [10.6-48]    | 18.6 ± 4.9 [9.5-32]      | 0.142              |
| VAT/predicted max VO <sub>2</sub> (%)               | 51 ± 19 [24-107]         | 50 ± 23 [24-107]         | 53 ± 14 [27-92]          | 0.595              |
| ΔVE/ΔVCO <sub>2</sub>                               | 28.2 ± 6.1 [18.8-50.3]   | 25.4 ± 3.8 [18.8-31.3]   | 30.0 ± 6.6 [21.2-50.3]   | <b>0.023</b>       |
| ΔVO <sub>2</sub> /ΔHR                               | 16.3 ± 6.41 [6-31.1]     | 20.1 ± 6.8 [8-31.1]      | 13.9 ± 4.95 [6-27.3]     | <b>0.003</b>       |
| Δ[VO <sub>2</sub> /kg]/ΔHR                          | 0.24 ± 0.09 [0.09-0.49]  | 0.28 ± 0.11 [0.09-0.49]  | 0.21 ± 0.06 [0.09-0.34]  | <b>0.018</b>       |

Data are presented as mean ± standard deviation [range]. P < 0.05 indicates statistical significance.

BMI, body mass index; CPET, cardiopulmonary exercise testing; HR, heart rate; pOP, peak oxygen pulse; pRER, peak respiratory exchange ratio; pVE, peak minute ventilation; pVO<sub>2</sub>, peak oxygen consumption; pWR, peak work rate; SBP, systolic blood pressure; VAT, ventilatory anaerobic threshold; VE, minute ventilation; VCO<sub>2</sub>, carbon dioxide production; VO<sub>2</sub>, oxygen consumption.

Table 3

## CMR Data

| CMR parameters              | All patients (N = 37)           | Male (N = 14)                  | Female (N = 23)                 | <i>p</i> Value |
|-----------------------------|---------------------------------|--------------------------------|---------------------------------|----------------|
| PRF (%)                     | 28.1 ± 13.9                     | 26.1 ± 15.7                    | 29.0 ± 13.1                     | 0.498          |
| RVEF (%)                    | 49.8 ± 8.0 [23-66]              | 46.9 ± 9.3 [23-65]             | 51.0 ± 6.6 [40-66]              | 0.094          |
| LVEF (%)                    | 58.4 ± 7.1 [39-75]              | 57.3 ± 7.5 [42-75]             | 59.0 ± 6.9 [39-75]              | 0.484          |
| RVEDV (mL)                  | 226 ± 58 [92-352]               | 267 ± 46 [186-353]             | 201 ± 50 [92-315]               | <b>0.0003</b>  |
| RVEDVi (mL/m <sup>2</sup> ) | 127 ± 28 [72-189]               | 142 ± 24 [112-189]             | 118 ± 27 [72-185]               | <b>0.009</b>   |
| <b>RVEDV z score</b>        | <b>2.55 ± 1.77 [-1.77-6.08]</b> | <b>2.39 ± 1.34 [0.43-5.33]</b> | <b>2.64 ± 1.96 [-1.77-6.08]</b> | 0.696          |
| LVEDV (mL)                  | 141 ± 38 [69-234]               | 161 ± 37 [98-220]              | 130 ± 34 [69-234]               | <b>0.013</b>   |
| LVEDVi (mL/m <sup>2</sup> ) | 82 ± 17 [55-137]                | 87 ± 16 [63-117]               | 78 ± 17 [55-137]                | 0.118          |
| LVEDV z score               | -0.67 ± 1.85 [-3.66-3.75]       | -0.97 ± 1.60 [-3.66-2.11]      | -0.51 ± 1.96 [-3.40-3.75]       | 0.488          |
| RVSV (mL)                   | 111 ± 32 [52-189]               | 125 ± 30 [67-170]              | 103 ± 31 [52-189]               | <b>0.044</b>   |
| RVSVi (mL/m <sup>2</sup> )  | 65 ± 16 [32-111]                | 68 ± 15 [34-90]                | 63 ± 16 [32-111]                | 0.291          |
| RVSV z score                | 1.10 ± 1.89 [-5.15-4.63]        | 0.36 ± 2.08 [-5.15-3.08]       | 1.50 ± 1.65 [-2.56-4.63]        | 0.087          |
| LVSV (mL)                   | 81 ± 20 [50-126]                | 92 ± 23 [59-126]               | 75 ± 15 [50-104]                | <b>0.009</b>   |
| LVSVi (mL/m <sup>2</sup> )  | 47 ± 9 [32.0-70.5]              | 50 ± 11 [32.0-71]              | 45 ± 7 [35-59]                  | 0.115          |
| LVSV z score                | -1.24 ± 1.52 [-5.81-2.11]       | -1.73 ± 1.78 [-5.81-1.49]      | -0.97 ± 1.29 [-3.12-2.11]       | 0.151          |

Data are presented as mean ± standard deviation [range]. *p* < 0.05 indicates statistical significance.

CMR, cardiac magnetic resonance; LVEDV, left ventricular end-diastole volume; LVEDVi, indexed left ventricular end-diastole volume; LVEF, left ventricular ejection fraction; LVSV, left ventricular stroke volume; LVSVi, indexed left ventricular stroke volume; PRF, pulmonary regurgitant fraction; RVEDV, right ventricular end-diastole volume; RVEDVi, indexed right ventricular end-diastole

volume; RVEF, right ventricular ejection fraction; RVSV, right ventricular stroke volume; RVSVi, indexed right ventricular stroke volume.

**Table 4 Symptoms, %predicted pVO<sub>2</sub>, and RVEDVi before and after PVR**

| Pt | Prior to PVR                                         |                                      |                                | After 1st PVR                            |                                      |                                | After 2nd PVR |                                      |                                |
|----|------------------------------------------------------|--------------------------------------|--------------------------------|------------------------------------------|--------------------------------------|--------------------------------|---------------|--------------------------------------|--------------------------------|
|    | Symptoms                                             | pVO <sub>2</sub> /kg<br>(%predicted) | RVEDVi<br>(mL/m <sup>2</sup> ) | Symptoms                                 | pVO <sub>2</sub> /kg<br>(%predicted) | RVEDVi<br>(mL/m <sup>2</sup> ) | Symptoms      | pVO <sub>2</sub> /kg<br>(%predicted) | RVEDVi<br>(mL/m <sup>2</sup> ) |
| 1  | None                                                 |                                      | 160                            | None →<br>endocarditis                   | -                                    | -                              | None          | 29.4 (85)                            | 100                            |
| 2  | Dizziness,<br>lightheaded,<br>shortness of<br>breath | 18.1 (52)                            | 110                            | Chronic fatigue                          | -                                    | -                              |               |                                      |                                |
| 3  | None                                                 | 27.2 (53)                            | 190                            | Exertional<br>dyspnea and<br>syncope     | 19.2 (37)                            | 148                            | None          | 21.3 (49)                            | 117                            |
| 4  | Dizziness                                            | 20 (47)                              | 122                            | Palpitations                             | -                                    | -                              |               |                                      |                                |
| 5  | None                                                 | 33.9 (69)                            | 94                             | None                                     | 30.8 (63)                            | 132                            |               |                                      |                                |
| 6  | None                                                 | 27.4 (65)                            | 138                            | Vasovagal<br>syncope and<br>palpitations | -                                    | -                              |               |                                      |                                |
| 7  | None                                                 | 48.9 (92)                            | 188                            | None                                     | 36.4 (86)                            | 169                            |               |                                      |                                |
| 8  | None                                                 | 47 (90)                              | 165                            | Chest pain                               | 38 (80)                              | 185                            |               |                                      |                                |
| 9  | None                                                 | 40.1 (87)                            | 189                            | Palpitations                             | 34.3 (76)                            | -                              |               |                                      |                                |

pVO<sub>2</sub>, peak oxygen consumption; PVR, pulmonary valve replacement; RVEDVi, right ventricular end-diastolic volume indexed by body surface area.

Unit of pVO<sub>2</sub>/kg is ml/kg/min.



**Figure 1**

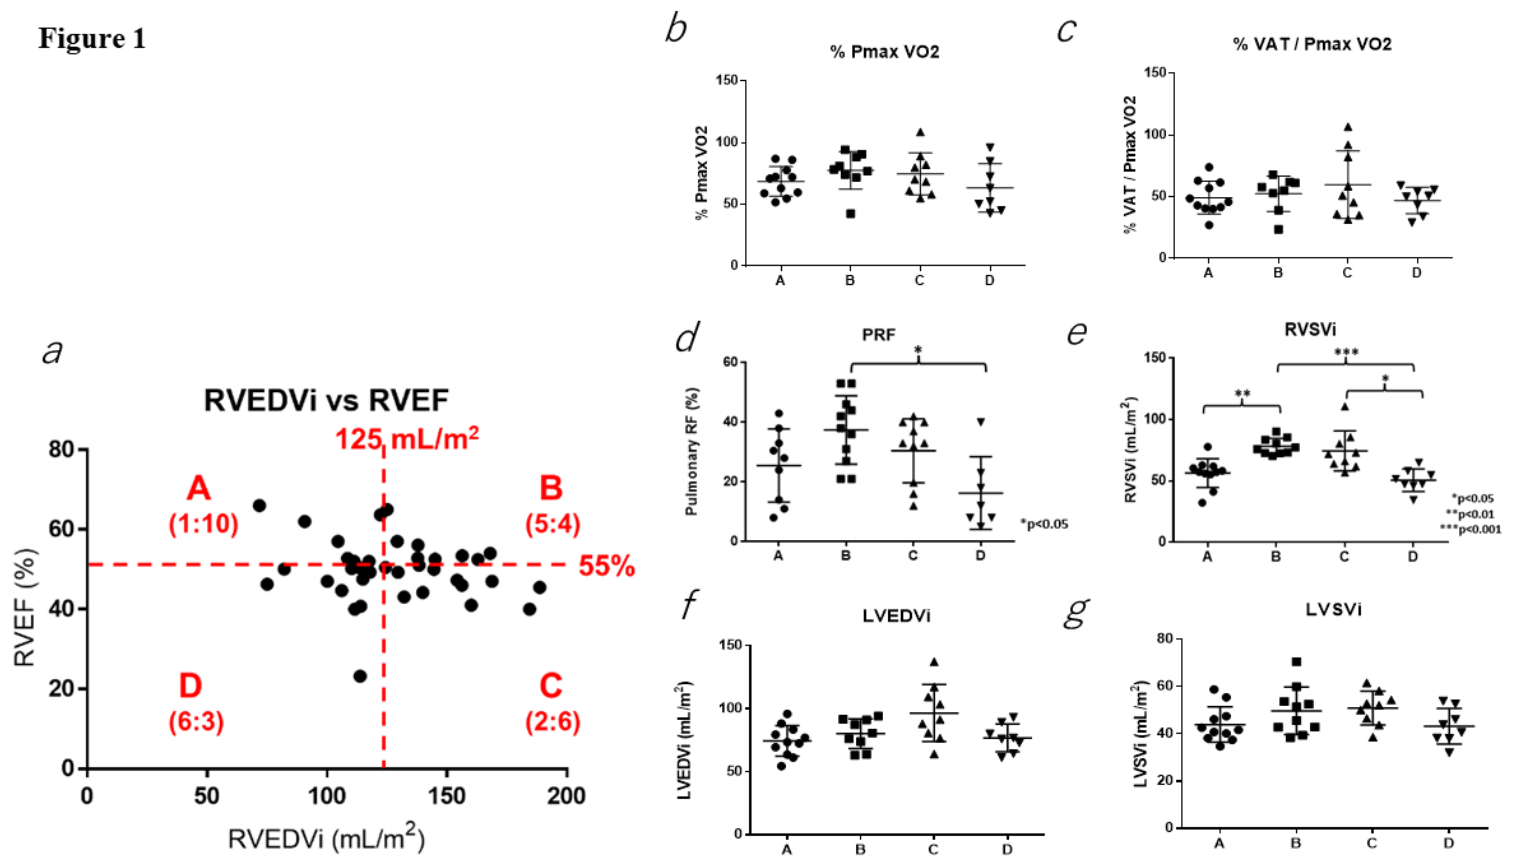

**Figure 2**

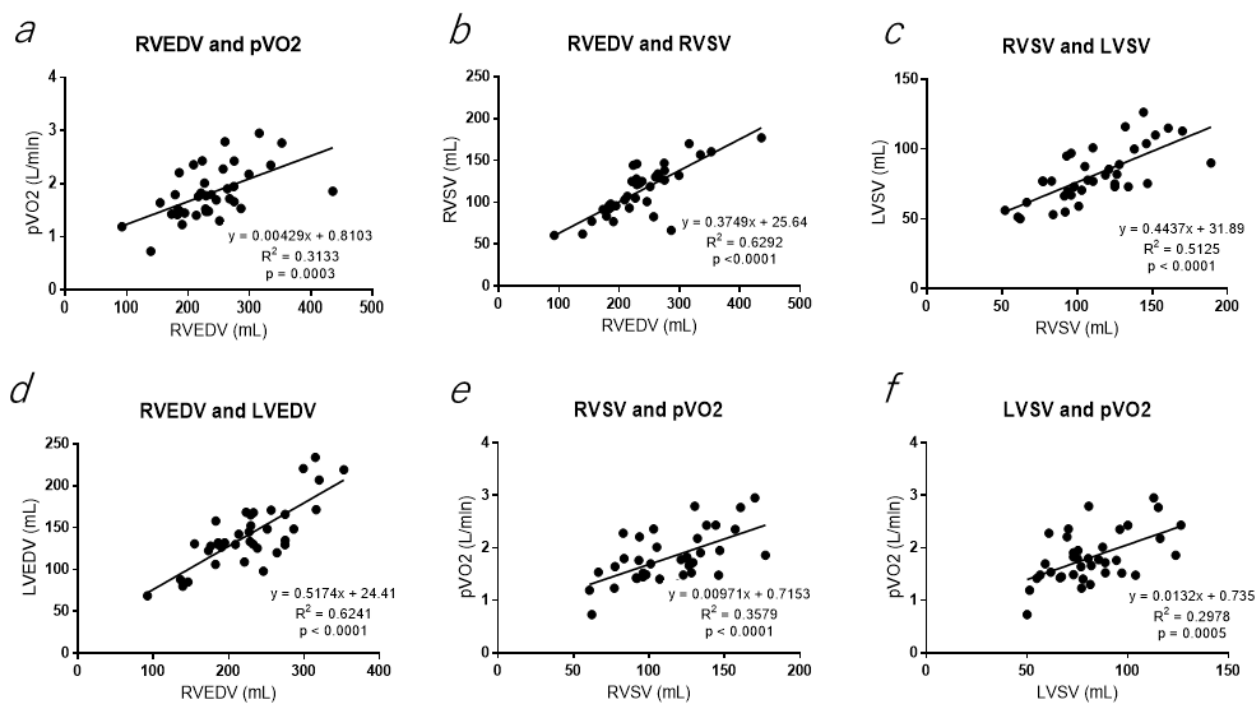

**Figure 3**

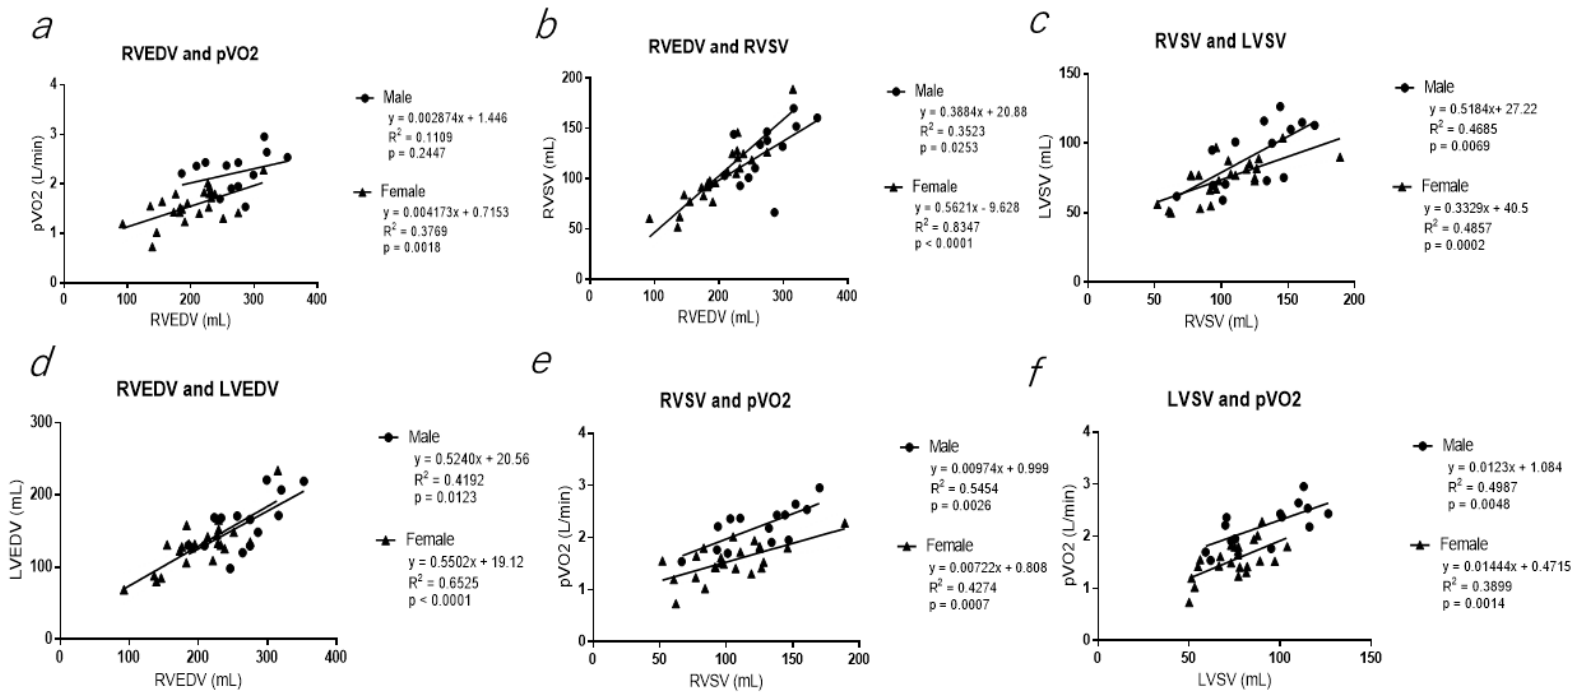

Source: https://medrxiv.org/content/10.1101/2024.04.12.24305748.full.pdf
